# Supplementary material for: High activity before breeding improves reproductive performance by enhancing mitochondrial function and biogenesis
Source: Oxford University Press journal article supplement (doi:10.1242/jeb.177469), 2018-01-01
Supplement: jeb177469supp.pdf [file jeb177469supp.pdf]

**Table S1.** Markers of oxidative damage (4-HNE and protein carbonyls) and antioxidants (CuZnSOD, MnSOD, catalase, GPX-1) in liver, skeletal muscle, heart, and brain. Data were obtained by western blotting and are presented as mean  $\pm$  standard error. The units for all variables are fold change relative to the no wheel group. n = 10 for each group. No significant differences were detected between groups ( $P > 0.05$ ).

|                         | <b>4-HNE</b>    | <b>Prot. carb</b> | <b>Catalase</b> | <b>GPX-1</b>     | <b>CuZnSOD</b>  | <b>MnSOD</b>    |
|-------------------------|-----------------|-------------------|-----------------|------------------|-----------------|-----------------|
| <b>Liver:</b>           |                 |                   |                 |                  |                 |                 |
| no wheel                | 1.00 $\pm$ 0.05 | 1.00 $\pm$ 0.11   | 1.00 $\pm$ 0.12 | 1.00 $\pm$ 0.10  | 1.00 $\pm$ 0.19 | 1.00 $\pm$ 0.06 |
| wheel                   | 1.03 $\pm$ 0.08 | 0.91 $\pm$ 0.08   | 1.21 $\pm$ 0.18 | 0.94 $\pm$ 0.10  | 0.79 $\pm$ 0.17 | 0.99 $\pm$ 0.11 |
| <b>Skeletal muscle:</b> |                 |                   |                 |                  |                 |                 |
| no wheel                | 1.00 $\pm$ 0.08 | 1.00 $\pm$ 0.07   | 1.00 $\pm$ 0.20 | 1.00 $\pm$ 0.19  | 1.00 $\pm$ 0.18 | 1.00 $\pm$ 0.18 |
| wheel                   | 1.03 $\pm$ 0.07 | 1.03 $\pm$ 0.06   | 1.03 $\pm$ 0.16 | 1.10 $\pm$ 0.21  | 1.12 $\pm$ 0.20 | 1.12 $\pm$ 0.20 |
| <b>Heart:</b>           |                 |                   |                 |                  |                 |                 |
| no wheel                | 1.00 $\pm$ 0.17 | 1.00 $\pm$ 0.24   | 1.00 $\pm$ 0.17 | 1.00 $\pm$ 0.57  | 1.00 $\pm$ 0.23 | 1.00 $\pm$ 0.13 |
| wheel                   | 0.96 $\pm$ 0.19 | 1.04 $\pm$ 0.08   | 0.74 $\pm$ 0.11 | 0.894 $\pm$ 0.11 | 1.06 $\pm$ 0.22 | 1.03 $\pm$ 0.12 |
| <b>Brain:</b>           |                 |                   |                 |                  |                 |                 |
| no wheel                | 1.00 $\pm$ 0.13 | 1.00 $\pm$ 0.10   | 1.00 $\pm$ 0.19 | 1.00 $\pm$ 0.27  | 1.00 $\pm$ 0.12 | 1.00 $\pm$ 0.20 |
| wheel                   | 1.00 $\pm$ 0.12 | 1.11 $\pm$ 0.13   | 0.95 $\pm$ 0.16 | 1.03 $\pm$ 0.27  | 1.19 $\pm$ 0.14 | 0.79 $\pm$ 0.21 |

Figure 1

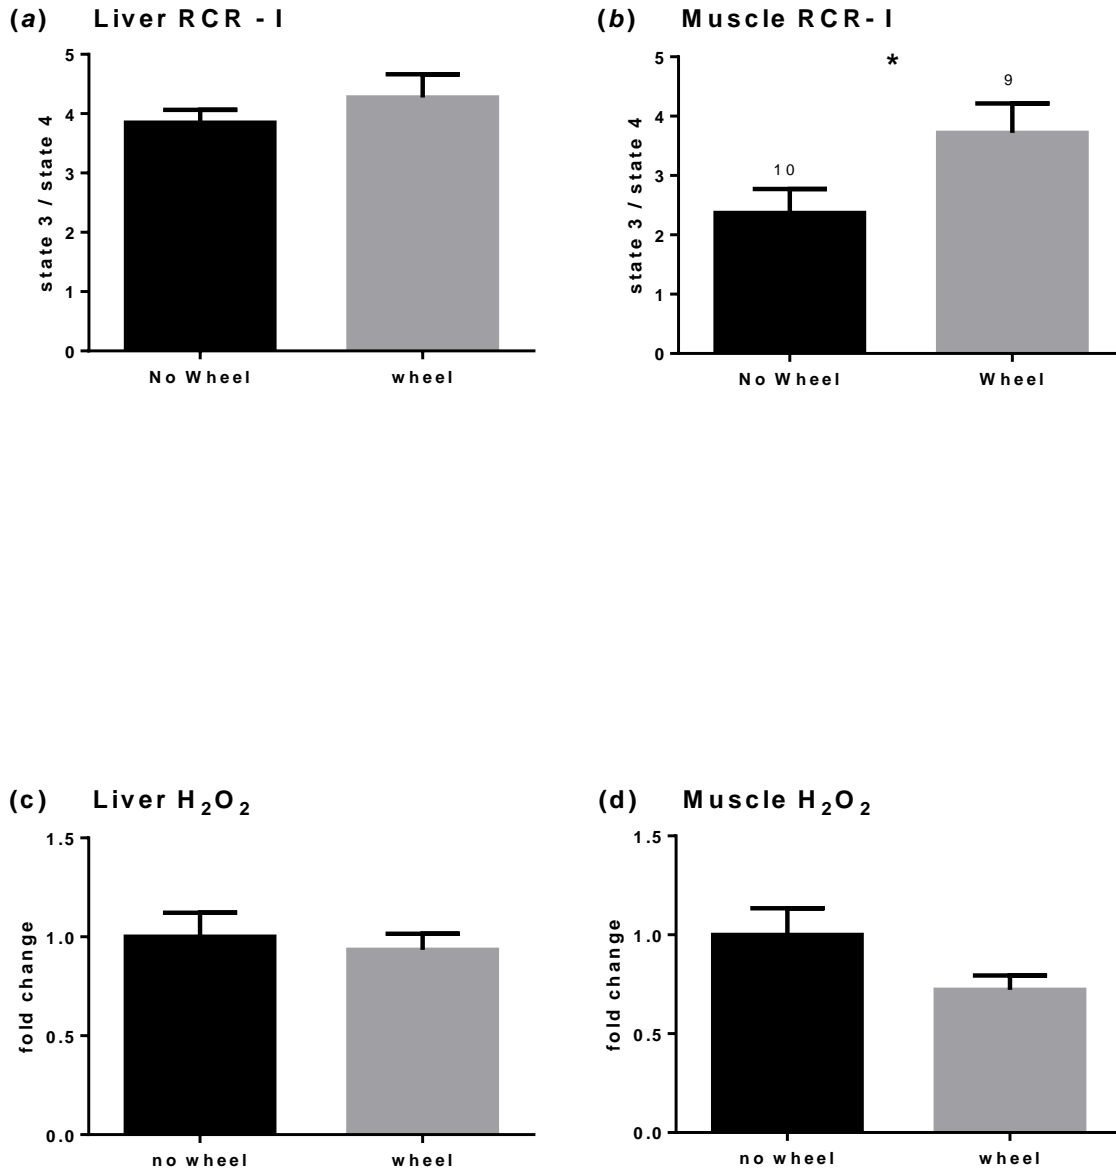

**Fig. S1.** Respiratory control ratio (RCR) and hydrogen peroxide (H<sub>2</sub>O<sub>2</sub>) emission by isolated mitochondria. Data from mitochondria isolated from (a and c) liver and (b and d) skeletal muscle. Data are presented as mean ± standard error. n = 10 for each group unless labeled above bars. \* indicates P < 0.05

Figure 2

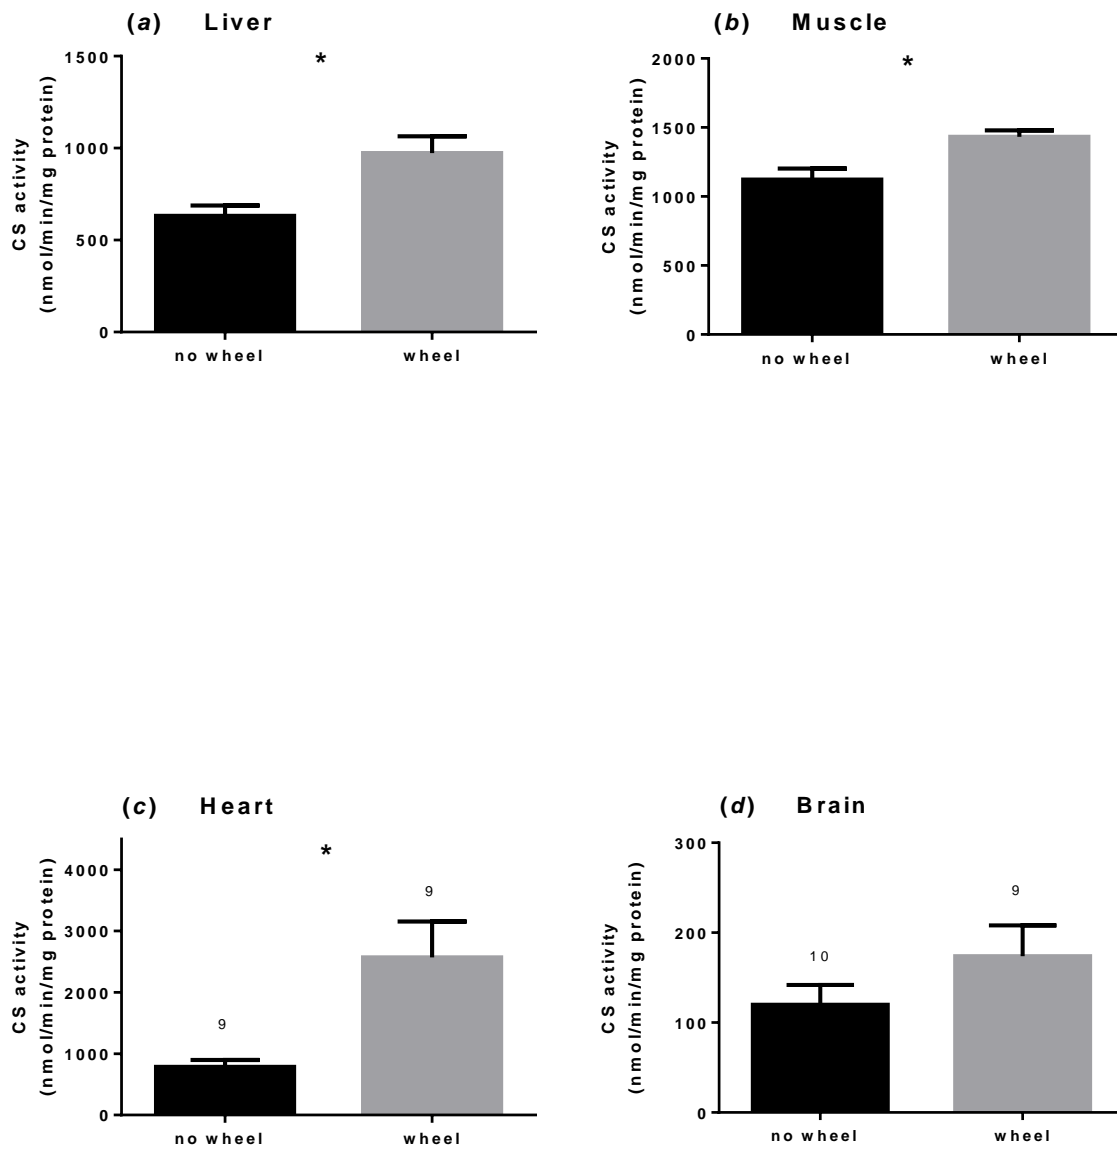

**Fig. S2.** Activity of citrate synthase in the (a) liver, (b) skeletal muscle, (c) heart, and (d) brain of mice. Data are presented as mean  $\pm$  standard error. n = 10 unless labeled above bars. \* indicates  $P < 0.05$
